# Supplementary material for: Allocation concealment appraisal of clinical therapy trials using the extended Composite Quality Score (CQS-2)—An empirically based update
Source: Front Med (Lausanne). 2023 Jun 15;10:1176219. doi: 10.3389/fmed.2023.1176219 (PMC10308079; doi:10.3389/fmed.2023.1176219)
Supplement: Supplementary file 1 [file Table_1.XLS]

## Sheet: Sheet1
			Allocation concealment appraisal of clinical therapy trials using the extended Composite Quality Score (CQS-2): An empirically based update
			Steffen Mickenautsch, Veerasamy Yengopal
			ADDITIONAL FILE
			A. Literature search
Nr.			1. Included Meta-epidemiological studies
1			Fenwick J, Needleman IG, Moles DR. The effect of bias on the magnitude of clinical outcomes in periodontology: a pilot study. J Clin Periodontol. 2008; 35:775-82.
1			Saltaji H, Armijo-Olivo S, Cummings GG, Amin M, da Costa BR, Flores-Mir C. Impact of selection bias on treatment effect size estimates in randomized trials of oral health interventions: A Meta-epidemiological study. J Dent Res. 2018; 97(1):5-13.
2
			2. Included Meta-analyses
			2.1. Accepted Meta-analyses
1		1	Kim AJ, Lo AJ, Pullin DA, Thornton-Johnson DS, Karimbux NY. 2012. Scaling and root planing treatment for periodontitis to reduce preterm birth and low birth weight: A systematic review and meta-analysis of randomized controlled trials. J Periodontol. 83(12):1508-1519.
			2.2. Excluded Meta-analyses
			Reason for exclusion: Point effect estimate of the treatment effect size (ES) = / < 0
1		1	Esposito M, Grusovin MG, Maghaireh H, Worthington HV. 2013. Interventions for replacing missing teeth: Different times for loading dental implants. Cochrane Database Syst Rev. 3:CD003878.
1		1	Marinho VC, Higgins JP, Sheiham A, Logan S. 2003b. Fluoride toothpastes for preventing dental caries in children and adolescents. Cochrane Database Syst Rev. (1):CD002278.
1		1	Berchier CE, Slot DE, Van der Weijden GA. 2010. The efficacy of 0.12% chlorhexidine mouthrinse compared with 0.2% on plaque accumulation and periodontal parameters: A systematic review. J Clin Periodontol. 37(9):829-839.
1		1	Lin GH, Chan HL, Bashutski JD, Oh TJ, Wang HL. 2014. The effect of flapless surgery on implant survival and marginal bone level: A systematic review and meta-analysis. J Periodontol. 85(5):e91-103.
1		1	Walsh T, Worthington HV, Glenny AM, Appelbe P, Marinho VC, Shi X. 2010. Fluoride toothpastes of different concentrations for preventing dental caries in children and adolescents. Cochrane Database Syst Rev. (1):CD007868.
1		1	Lin PY, Cheng YW, Chu CY, Chien KL, Lin CP, Tu YK. 2013. In-office treatment for dentin hypersensitivity: A systematic review and network meta-analysis. J Clin Periodontol. 40(1):53-64.
1		1	Engebretson S, Kocher T. 2013. Evidence that periodontal treatment improves diabetes outcomes: A systematic review and meta-analysis. J Periodontol. 84(4 Suppl):S153-169.
1		1	Atieh MA, Ibrahim HM, Atieh AH. 2010. Platform switching for marginal bone preservation around dental implants: A systematic review and meta-analysis. J Periodontol. 81(10):1350-1366.
1		1	Eberhard J, Jepsen S, Jervoe-Storm PM, Needleman I, Worthington HV. 2008. Full-mouth disinfection for the treatment of adult chronic periodontitis. Cochrane Database Syst Rev. (1):CD004622.
1		1	Sgolastra F, Petrucci A, Severino M, Graziani F, Gatto R, Monaco A. 2013b. Adjunctive photodynamic therapy to non-surgical treatment of chronic periodontitis: A systematic review and meta-analysis. J Clin Periodontol. 40(5):514-526.
1		1	Bjordal JM, Bensadoun RJ, Tuner J, Frigo L, Gjerde K, Lopes-Martins RA. 2011. A systematic review with meta-analysis of the effect of low-level laser therapy (lllt) in cancer therapy-induced oral mucositis. Supportive Care in Cancer. 19(8):1069-1077.
1		1	Teeuw WJ, Slot DE, Susanto H, Gerdes VE, Abbas F, D'Aiuto F, Kastelein JJ, Loos BG. 2014. Treatment of periodontitis improves the atherosclerotic profile: A systematic review and meta-analysis. J Clin Periodontol. 41(1):70-79.
1		1	Sgolastra F, Petrucci A, Severino M, Gatto R, Monaco A. 2013a. Lasers for the treatment of dentin hypersensitivity: A meta-analysis. J Dent Res. 92(6):492-499.
1		1	Furness S, Worthington HV, Bryan G, Birchenough S, McMillan R. 2011. Interventions for the management of dry mouth: Topical therapies. Cochrane Database Syst Rev. (12):CD008934.
1		1	Hasson H, Ismail AI, Neiva G. 2006. Home-based chemically-induced whitening of teeth in adults. Cochrane Database Syst Rev. (4):CD006202.
1		1	Davies RM, Ellwood RP, Davies GM. 2004. The effectiveness of a toothpaste containing triclosan and polyvinyl-methyl ether maleic acid copolymer in improving plaque control and gingival health: A systematic review. J Clin Periodontol. 31(12):1029-1033.
1		1	Stoeken JE, Paraskevas S, van der Weijden GA. 2007. The long-term effect of a mouthrinse containing essential oils on dental plaque and gingivitis: A systematic review. J Periodontol. 78(7):1218-1228.
1		1	Cunha-Cruz J, Stout JR, Heaton LJ, Wataha JC. 2011. Dentin hypersensitivity and oxalates: A systematic review. J Dent Res. 90(3):304-310.
18
			Reason for exclusion: too few trials (< 4) included in analysis
1	1		Beirne P, Forgie A, Worthington HV, Clarkson JE. Routine scale and polish for periodontal health in adults. Cochrane Database Syst Rev. 2005 Jan 25;(1):CD004625.
1	1		Esposito M, Grusovin MG, Coulthard P, Worthington HV. Interventions for replacing missing teeth: treatment of perimplantitis. Cochrane Database Syst Rev. 2006 Jul 19;(3):CD004970.
1	1		Esposito M, Worthington HV, Thomsen P, Coulthard P. Interventions for replacing missing teeth: maintaining health around dental implants. Cochrane Database Syst Rev. 2004;(3):CD003069.
1		1	Esposito M, Grusovin MG, Papanikolaou N, Coulthard P, Worthington HV. 2009. Enamel matrix derivative (emdogain(r)) for periodontal tissue regeneration in intrabony defects. Cochrane Database Syst Rev. (4):CD003875.
1		1	Ebrahim S, Montoya L, Busse JW, Carrasco-Labra A, Guyatt GH. 2012. The effectiveness of splint therapy in patients with temporomandibular disorders: A systematic review and meta-analysis. J Am Dent Assoc. 143(8):847-857.
1		1	Li W, Xiao L, Hu J. 2012. The use of enamel matrix derivative alone versus in combination with bone grafts to treat patients with periodontal intrabony defects: A meta-analysis. J Am Dent Assoc. 143(9):e46-56.
1		1	Needleman IG, Worthington HV, Giedrys-Leeper E, Tucker RJ. 2006. Guided tissue regeneration for periodontal infra-bony defects. Cochrane Database Syst Rev. (2):CD001724.
1		1	Haps S, Slot DE, Berchier CE, Van der Weijden GA. 2008. The effect of cetylpyridinium chloride-containing mouth rinses as adjuncts to toothbrushing on plaque and parameters of gingival inflammation: A systematic review. Int J Dent Hyg. 6(4):290-303.
1		1	Sahrmann P, Puhan MA, Attin T, Schmidlin PR. 2010. Systematic review on the effect of rinsing with povidone-iodine during nonsurgical periodontal therapy. Journal of periodontal research. 45(2):153-164.
1		1	Riley P, Lamont T. 2013. Triclosan/copolymer containing toothpastes for oral health. Cochrane Database Syst Rev. 12:CD010514.
1		1	Robinson PG, Deacon SA, Deery C, Heanue M, Walmsley AD, Worthington HV, Glenny AM, Shaw WC. 2005. Manual versus powered toothbrushing for oral health. Cochrane Database Syst Rev. (2):CD002281.
1		1	Wright JT, Hanson N, Ristic H, Whall CW, Estrich CG, Zentz RR. 2014. Fluoride toothpaste efficacy and safety in children younger than 6 years: A systematic review. J Am Dent Assoc. 145(2):182-189.
1		1	Sgolastra F, Petrucci A, Gatto R, Monaco A. 2012. Effectiveness of systemic amoxicillin/metronidazole as an adjunctive therapy to full-mouth scaling and root planing in the treatment of aggressive periodontitis: A systematic review and meta-analysis. J Periodontol. 83(6):731-743.
1		1	Angelopoulou MV, Vlachou V, Halazonetis DJ. 2012. Pharmacological management of pain during orthodontic treatment: A meta-analysis. Orthod Craniofac Res. 15(2):71-83.
1		1	Aggarwal VR, Lovell K, Peters S, Javidi H, Joughin A, Goldthorpe J. 2011. Psychosocial interventions for the management of chronic orofacial pain. Cochrane Database Syst Rev. (11):CD008456.
1		1	Brocklehurst P, Tickle M, Glenny AM, Lewis MA, Pemberton MN, Taylor J, Walsh T, Riley P, Yates JM. 2012. Systemic interventions for recurrent aphthous stomatitis (mouth ulcers). Cochrane Database Syst Rev. 9:CD005411.
1		1	Annibali S, Bignozzi I, Cristalli MP, Graziani F, La Monaca G, Polimeni A. 2012. Peri-implant marginal bone level: A systematic review and meta-analysis of studies comparing platform switching versus conventionally restored implants. J Clin Periodontol. 39(11):1097-1113.
17
			Reason for exclusion: not all trials traceable
1		1	Shi Z, Xie H, Wang P, Zhang Q, Wu Y, Chen E, Ng L, Worthington HV, Needleman I, Furness S. 2013. Oral hygiene care for critically ill patients to prevent ventilator-associated pneumonia. Cochrane Database Syst Rev. 8:CD008367.
1		1	Marinho VC, Higgins JP, Logan S, Sheiham A. 2003a. Fluoride mouthrinses for preventing dental caries in children and adolescents. Cochrane Database Syst Rev. (3):CD002284.
2
			Reason for exclusion: no computable data reported
1		1	Paraskevas S, van der Weijden GA. 2006. A review of the effects of stannous fluoride on gingivitis. J Clin Periodontol. 33(1):1-13.
1		1	Darre L, Vergnes JN, Gourdy P, Sixou M. 2008. Efficacy of periodontal treatment on glycaemic control in diabetic patients: A meta-analysis of interventional studies. Diabetes & metabolism. 34(5):497-506.
1		1	Cairo F, Pagliaro U, Nieri M. 2008. Treatment of gingival recession with coronally advanced flap procedures: A systematic review. J Clin Periodontol. 35(8 Suppl):136-162.
3
			Reason for exclusion: no allocation concealment appraisal reported
1		1	Sutherland S, Matthews DC. 2003. Emergency management of acute apical periodontitis in the permanent dentition: A systematic review of the literature. J Can Dent Assoc. 69(3):160.
			Reason for exclusion: duplication
1	1		Needleman IG, Worthington HV, Giedrys-Leeper E, Tucker RJ. 2006. Guided tissue regeneration for periodontal infra-bony defects. Cochrane Database Syst Rev. (2):CD001724.
1	1		Esposito M, Grusovin MG, Coulthard P, Worthington HV. Enamel matrix derivative (Emdogain) for periodontal tissue regeneration in intrabony defects. Cochrane Database Syst Rev. 2005 Oct 19;(4):CD003875.
2	5	39
			3. Included clincial trials
			3.1. Wits adequate allocation concealment
1			Radnai M, Pa´ l A, Nova´k T, Urba´n E, Eller J, Gorzo´ I. Benefits of periodontal therapy when preterm birth threatens. J Dent Res 2009;88:280-284.
1			Jeffcoat MK, Hauth JC, Geurs NC, et al. Periodontal disease and preterm birth: Results of a pilot intervention study. J Periodontol 2003;74:1214-1218.
1			Offenbacher S, Beck JD, Jared HL, et al; Maternal Oral Therapy to Reduce Obstetric Risk (MOTOR) Investigators. Effects of periodontal therapy on rate of preterm delivery: A randomized controlled trial. Obstet Gynecol 2009;114:551-559.
1			Michalowicz BS, Hodges JS, DiAngelis AJ, et al; OPT Study. Treatment of periodontal disease and the risk of preterm birth. N Engl J Med 2006;355:1885-1894.
1			Newnham JP, NewnhamIA, Ball CM, et al. Treatment of periodontal disease during pregnancy: A randomized controlled trial. Obstet Gynecol 2009;114:1239-1248.
5
			3.2. With inadequate/unclear allocation concealment
1			Sadatmansouri S, Sedighpoor N, Aghaloo M. Effects of periodontal treatment phase I on birth term and birth weight. J Indian Soc Pedod Prev Dent 2006;24:23-26.
1			Lopez NJ, Smith PC, Gutierrez J. Periodontal therapy may reduce the risk of preterm low birth weight in women with periodontal disease: A randomized controlled trial. J Periodontol 2002;73:911-924.
1			Offenbacher S, Lin D, Strauss R, et al. Effects of periodontal therapy during pregnancy on periodontal status, biologic parameters, and pregnancy outcomes: A pilot study. J Periodontol 2006;77:2011-2024.
1			Macones GA, Parry S, Nelson DB, et al. Treatment of localized periodontal disease in pregnancy does not reduce the occurrence of preterm birth: Results from the Periodontal Infections and Prematurity Study (PIPS). Am J Obstet Gynecol 2010;202:147-156, e1-e8.
1			Tarannum F, Faizuddin M. Effect of periodontal therapy on pregnancy outcome in women affected by periodontitis. J Periodontol 2007;78:2095-2103.
5
			B. Extracted trial data
			1. Baseline values (Age)
			1.1. Analysis 1	Test group			Control group						Abbreviations
			Trial (see 3.2)	mean	SD	n	mean	SD	n	I2 = 21%	t-statistic		SD = Standard deviation
			Lopez et al., 2002	28	4.5	163	27	4.3	188	0	2.13		n = Number of events
			Offenbacher et al., 2006	26.8	5.5	40	25.7	5.4	34		0.87		N = Total number of measurements
			Macones et al., 2010	24.1	5.2	376	24.4	5.7	380		0.75		RR = Relative risk
			Tarannum and Faizuddin, 2007	23	3.3	100	22.9	3.6	100		0.2		LCL = Lower 95%Confidence level
			Sadatmansouri et al., 2006	29.1	4.3	15	28.4	4.1	15		0.05		UCL = Upper 95%Confidence level
			1.2. Analysis 2
			Lopez et al., 2002	28	4.5	163	27	4.3	188	0	2.13
			Macones et al., 2010	24.1	5.2	376	24.4	5.7	380		0.75
			Tarannum and Faizuddin, 2007	23	3.3	100	22.9	3.6	100		0.2
			Sadatmansouri et al., 2006	29.1	4.3	15	28.4	4.1	15		0.05
			2. Effect estimates
			2.1. Analysis 1 (preterm birth <37 weeks of gestation)
				Test		Control
				n	N	n	N
			Sadatmansouri et al., 2006	0	15	3	15
			Lopez et al., 2002	2	163	12	188
			Offenbacher et al., 2006	9	35	14	32
			Macones et al., 2010	38	359	37	361
			Tarannum and Faizuddin, 2007	45	91	68	89
			2.2. Analysis 2 <37 weeks of pretern birth risk group/moderate risk group
			Sadatmansouri et al., 2006	0	15	1	15
			Lopez et al., 2002	1	163	7	188
			Macones et al., 2010	48	359	35	361
			Tarannum and Faizuddin, 2007	19	91	48	89
			C. Test results
			1. Analysis 1
				RR	LCL	UCL	p-value
			Replicated	0.66	0.45	0.98	0.04
			Testet	0.72	0.51	1.02	0.07	True positive
			2. Analysis 2
			Replicated	0.54	0.19	1.55	0.25
			Testet	0.68	0.22	2.11	0.5	True positive
			D. Details of logical inference
